# Supplementary material for: Relative contributions of fasting and postprandial glucose increments, glycemic variability, and non‐glycemic factors to HbA1c in individuals with type 1 diabetes
Source: PubMed Central journal article supplement (PMC10270743; doi:10.1111/1753-0407.13388), 2023-05-04
Supplement: JDB-15-465-s002.pdf [file JDB-15-465-s002.pdf]

## Supplementary Materials

**Figure S1. Flowchart of the dataset selection included in this study**

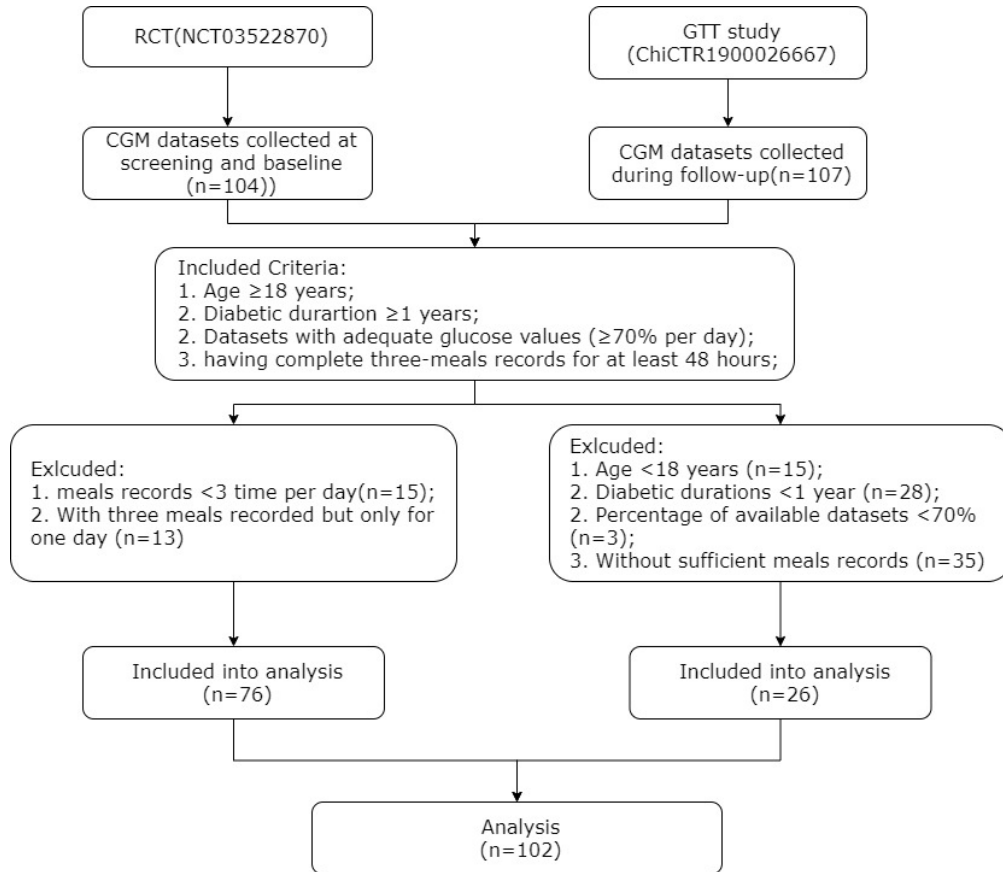

**Figure S2 Calculation of the AUC**

**(A)**

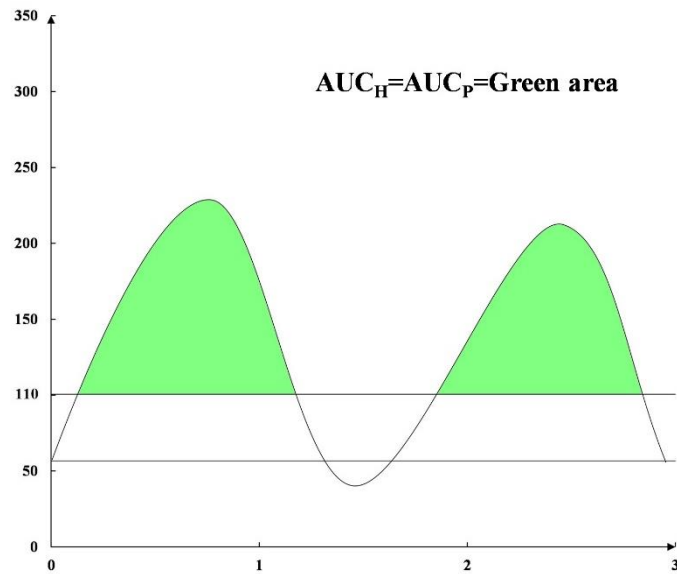

When pre-prandial glucose was under 110mg/dL

**(B)**

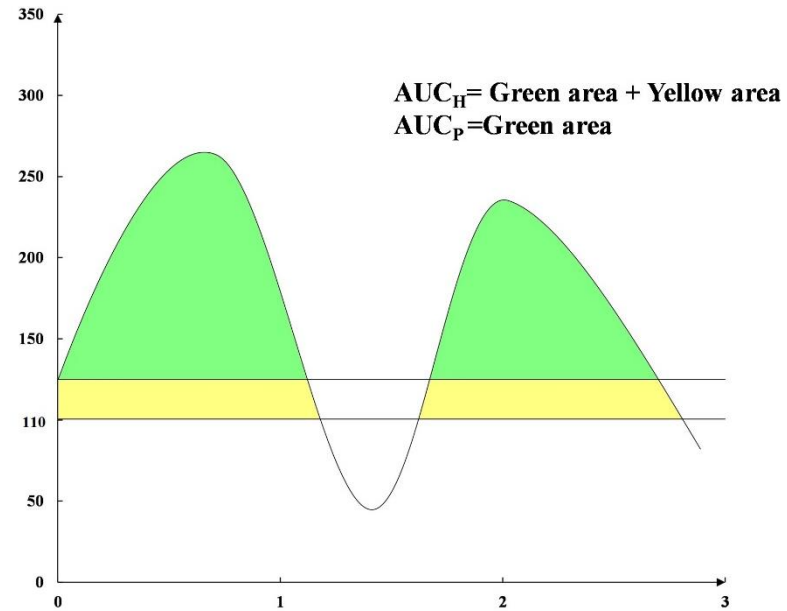

When pre-prandial glucose was above/equal 110mg/dL

**Fasting hyperglycemia** =  $AUC_H - AUC_P$ ;

**Fasting contribution (%) [FHG]** =  $(AUC_H - AUC_P) / AUC_H$ ;

**Postprandial hyperglycemia** =  $AUC_P$ ;

**Postprandial contribution (%) [PHG]** =  $AUC_P / AUC_H$ .

Notes:  $AUC_H$  was the area above 110 mg/dL;  $AUC_P$  was the area above 110 mg/dL and above pre-prandial glucose level;

**Figure S3. Glycemic control at the three mealtimes in different groups stratified by HbA1c**

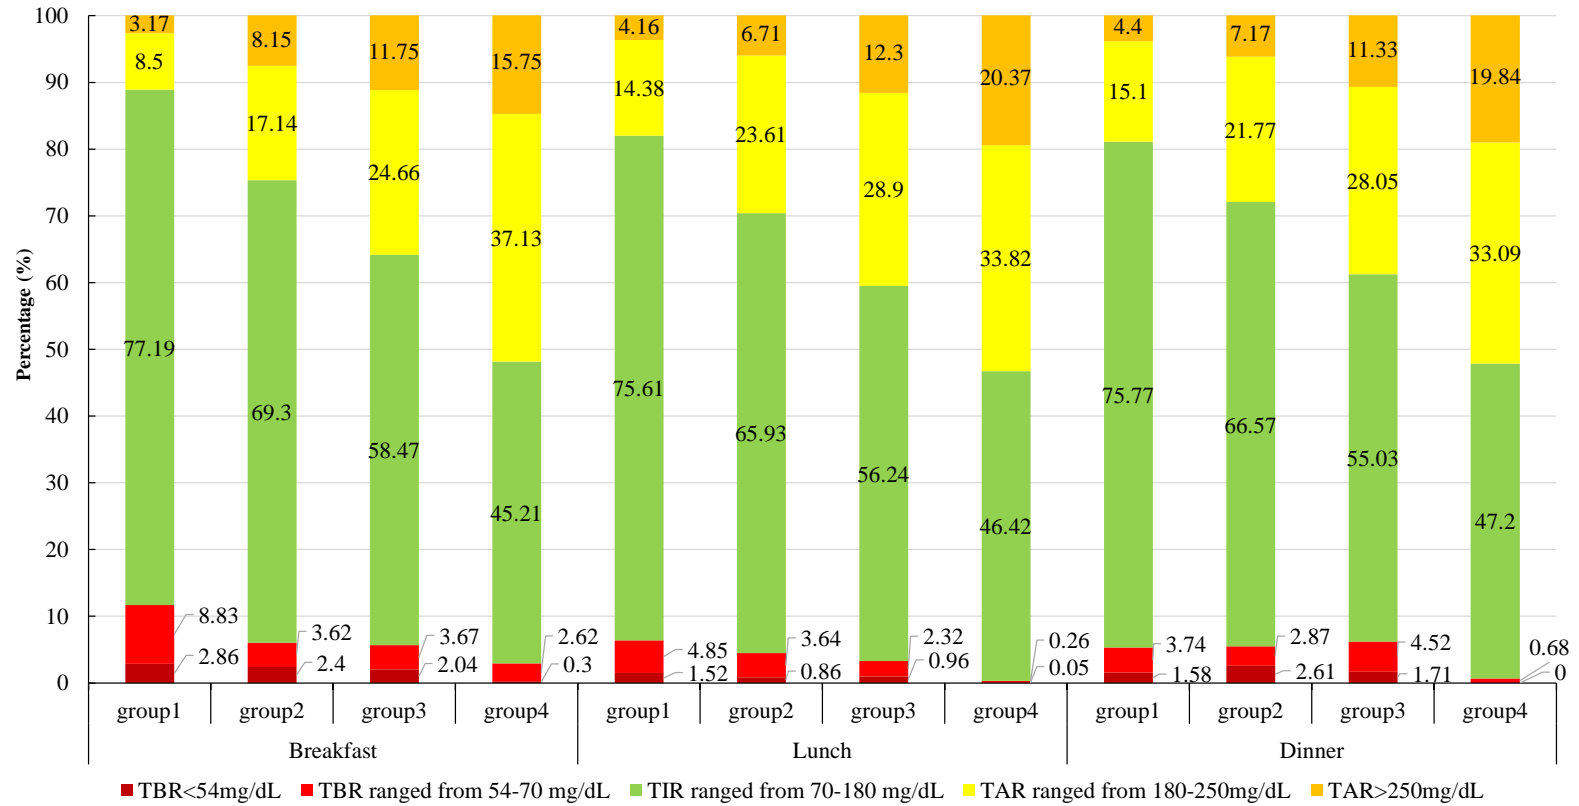

Figure legends: Notes: TBR, time below range; TIR, time spent in range; TAR, time above range.

**Figure S4. Mean (95%CI) difference in HbA1c (%) by 1-SD difference in CGM-derived glycemic metrics.**

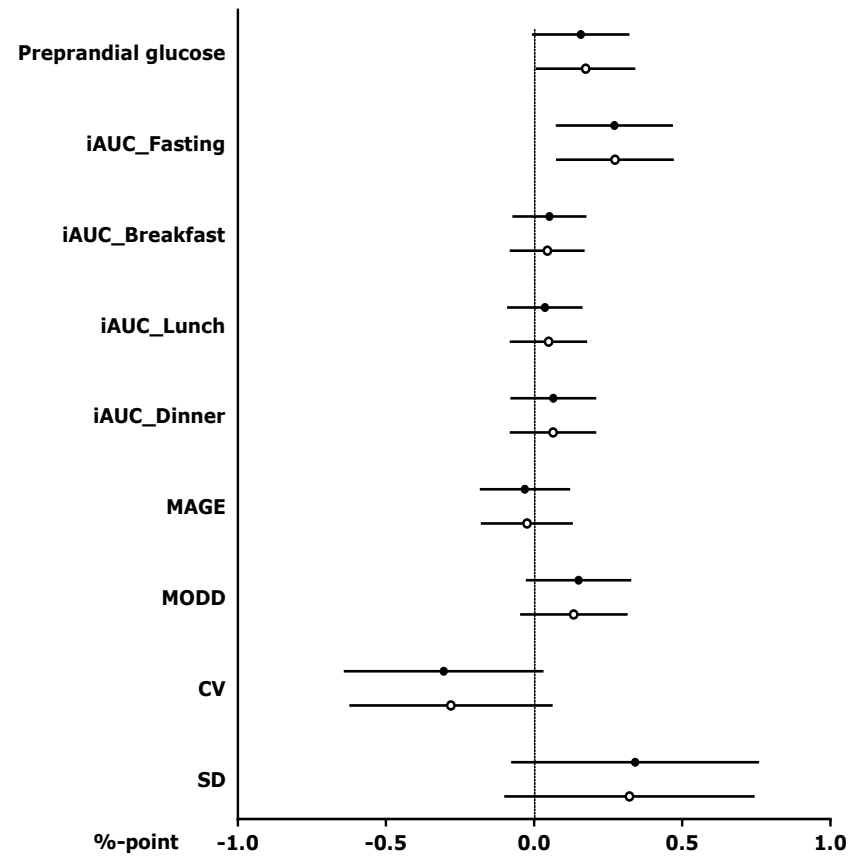

Figure legends: Estimated differences are unadjusted (dotted) and adjusted (dashed) for age, body mass index and Hb.
